# Supplementary material
Source: MDPI journal article supplement (https://www.mdpi.com/2073-4352/12/1/95)
Supplement: s1 [file s1]

# Supplementary Materials: Synthesis, Crystal Structures and Magnetic Properties of Trinuclear $\{Ni_2Ln\}$ ( $Ln^{III} = Dy, Ho$ ) and $\{Ni_2Y\}$ Complexes with Schiff Base Ligands

Despina Dermitzaki <sup>1</sup>, Angeliki Panagiotopoulou <sup>2</sup>, Michael Pissas <sup>1</sup>, Yiannis Sanakis <sup>1</sup>, Vassilis Psycharis <sup>1,\*</sup> and Catherine P. Raptopoulou <sup>1,\*</sup>

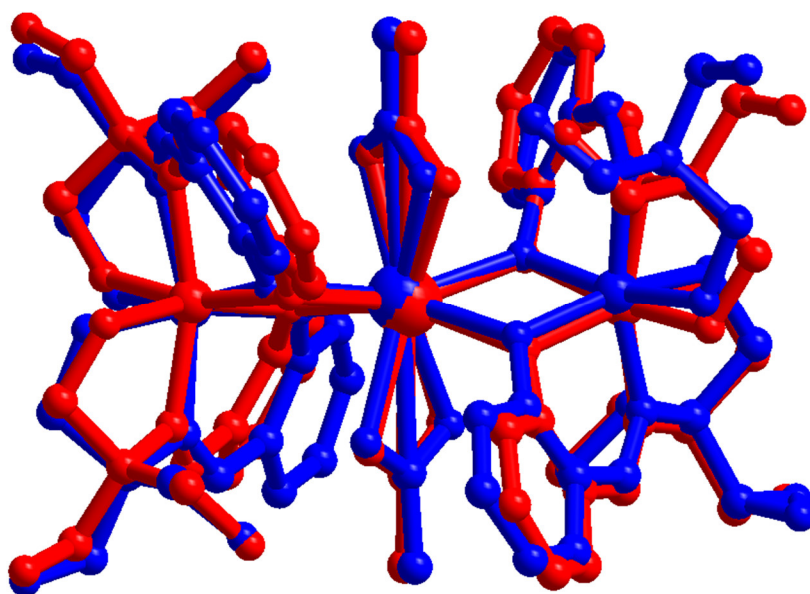

**Figure S1.** Overlay diagrams of  $\{Ni_2Tb\}$  (red, ref 19) and **1** (blue, present work).

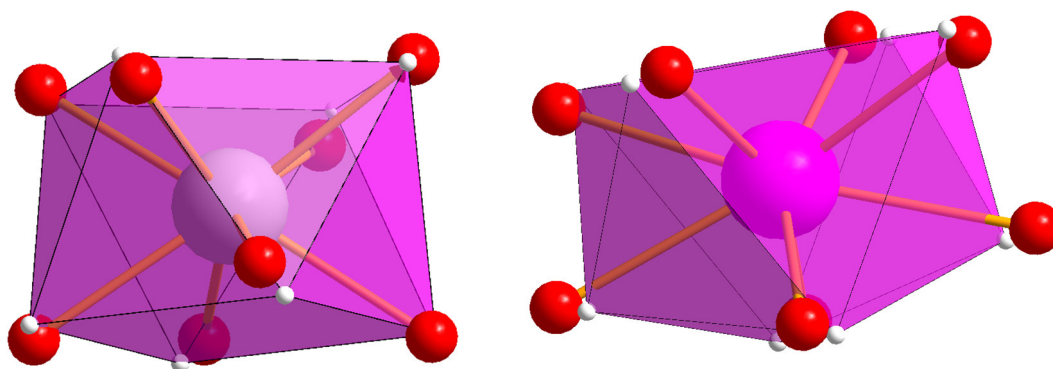

**Figure S2.** Square antiprism polyhedron of  $\{Ni_2Tb\}$  (left image, 19) and biaugmented trigonal prism one for **1** (right).

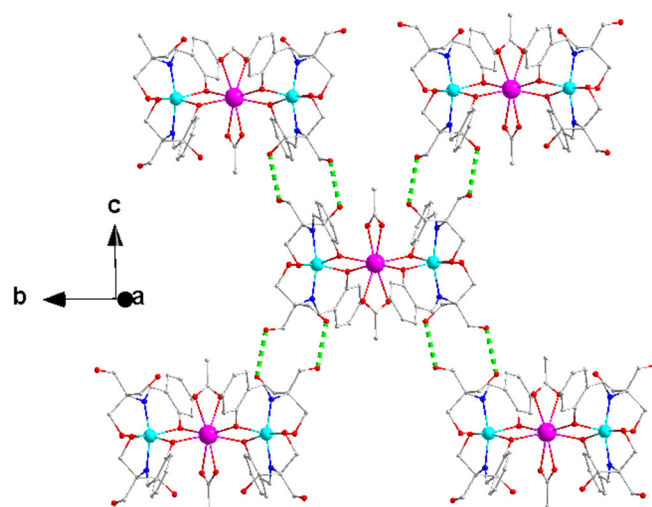

(a)

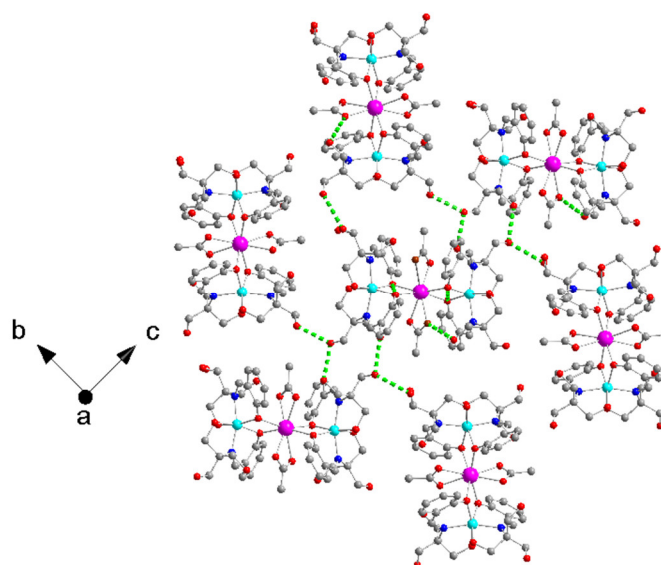

(b)

**Figure S3.** (a) Packing of complexes in the structure of  $\{Ni_2Tb\}$  and (b) in the structure of **1**.**Table S1.** CShM parameters for the polyhedrons around the lanthanide ion in  $\{Ni_2Tb\}$  and **1-3**.

|        | CShM values    |                |                |                |
|--------|----------------|----------------|----------------|----------------|
|        | $\{Ni_2Tb\}$   | <b>1</b>       | <b>2</b>       | <b>3</b>       |
| SAPR-8 | <b>3.09989</b> | 3.20060        | 3.24598        | 3.14649        |
| BTPR-8 | 3.54127        | <b>2.88485</b> | <b>2.82977</b> | <b>2.83450</b> |
